# Supplementary material
Source: PubMed Central journal article supplement (PMC3137757)
Supplement: NIHMS271750-supplement-Supp_Table_S1-S14.pdf [file NIHMS271750-supplement-Supp_Table_S1-S14.pdf]

**Web-based Supplementary Materials for**  
**“Optimizing the Concentration and Bolus of a Drug Delivered by Continuous Infusion”**  
**by Thall, Szabo, Nguyen, Amlie-Lefond, and Zaidat.**

**Supplementary Table 1.** Scenario that is the same as the elicited prior.

| Scenario 1 (Same as the elicited prior) |                          | Concentration |           |           |           |
|-----------------------------------------|--------------------------|---------------|-----------|-----------|-----------|
|                                         |                          | $c = 0.2$     | $c = 0.3$ | $c = 0.4$ | $c = 0.5$ |
| $q = 0.1$                               | Bolus                    |               |           |           |           |
|                                         | $F_E(0, c, q)$           | .10           | .15       | .15       | .25       |
|                                         | $F_E(\frac{1}{2}, c, q)$ | .25           | .30       | .45       | .60       |
|                                         | $F_E(1, c, q)$           | .35           | .45       | .60       | .70       |
|                                         | $\pi_T(0, c, q)$         | .02           | .03       | .03       | .03       |
|                                         | $\pi_T(1, c, q)$         | .04           | .06       | .08       | .12       |
|                                         | $u^{true}(c, q)$         | 46.9          | 51.3      | 59.3      | 64.1      |
| $q = 0.2$                               | $F_E(0, c, q)$           | .15           | .20       | .25       | .30       |
|                                         | $F_E(\frac{1}{2}, c, q)$ | .40           | .45       | .50       | .60       |
|                                         | $F_E(1, c, q)$           | .50           | .60       | .70       | .80       |
|                                         | $\pi_T(0, c, q)$         | .02           | .03       | .03       | .03       |
|                                         | $\pi_T(1, c, q)$         | .04           | .06       | .08       | .12       |
|                                         | $u^{true}(c, q)$         | 56.1          | 60.5      | 65.1      | 70.6      |

**Supplementary Table 2.** Scenario where the highest concentration is best.

---

| Scenario 2 (Highest concentration and bolus best) |                  | Concentration |           |           |           |
|---------------------------------------------------|------------------|---------------|-----------|-----------|-----------|
|                                                   |                  | $c = 0.2$     | $c = 0.3$ | $c = 0.4$ | $c = 0.5$ |
| $q = 0.1$                                         | $F_E(0, c, q)$   | .10           | .15       | .20       | .30       |
|                                                   | $F_E(1, c, q)$   | .40           | .50       | .65       | .80       |
|                                                   | $\pi_T(0, c, q)$ | .01           | .01       | .02       | .02       |
|                                                   | $\pi_T(1, c, q)$ | .03           | .03       | .04       | .05       |
|                                                   | $u^{true}(c, q)$ | 49.0          | 54.9      | 62.4      | 71.5      |
| $q = 0.2$                                         | $F_E(0, c, q)$   | .15           | .20       | .25       | .30       |
|                                                   | $F_E(1, c, q)$   | .45           | .55       | .70       | .85       |
|                                                   | $\pi_T(0, c, q)$ | .01           | .01       | .02       | .02       |
|                                                   | $\pi_T(1, c, q)$ | .03           | .03       | .04       | .05       |
|                                                   | $u^{true}(c, q)$ | 52.6          | 58.4      | 65.9      | 73.8      |

---

**Supplementary Table 3.** Scenario where the middle concentrations are best.

| Scenario 3 (Middle concentrations best) |                  | Concentration |           |           |           |
|-----------------------------------------|------------------|---------------|-----------|-----------|-----------|
|                                         |                  | $c = 0.2$     | $c = 0.3$ | $c = 0.4$ | $c = 0.5$ |
| Bolus                                   |                  |               |           |           |           |
| $q = 0.1$                               | $F_E(0, c, q)$   | .40           | .58       | .62       | .64       |
|                                         | $F_E(1, c, q)$   | .48           | .68       | .72       | .74       |
|                                         | $\pi_T(0, c, q)$ | .06           | .08       | .10       | .20       |
|                                         | $\pi_T(1, c, q)$ | .08           | .10       | .12       | .22       |
|                                         | $u^{true}(c, q)$ | 57.3          | 68.9      | 70.1      | 64.0      |
| $q = 0.2$                               | $F_E(0, c, q)$   | .42           | .60       | .64       | .66       |
|                                         | $F_E(1, c, q)$   | .50           | .70       | .74       | .76       |
|                                         | $\pi_T(0, c, q)$ | .08           | .10       | .12       | .22       |
|                                         | $\pi_T(1, c, q)$ | .12           | .14       | .16       | .26       |
|                                         | $u^{true}(c, q)$ | 57.1          | 68.6      | 69.7      | 63.5      |

**Supplementary Table 4.** Scenario where the lowest concentration is best.

| Scenario 4 (Lowest concentration best) |                  | Concentration |           |           |           |
|----------------------------------------|------------------|---------------|-----------|-----------|-----------|
|                                        |                  | $c = 0.2$     | $c = 0.3$ | $c = 0.4$ | $c = 0.5$ |
| $q = 0.1$                              | $F_E(0, c, q)$   | .13           | .14       | .15       | .16       |
|                                        | $F_E(1, c, q)$   | .66           | .68       | .70       | .72       |
|                                        | $\pi_T(0, c, q)$ | .02           | .06       | .15       | .20       |
|                                        | $\pi_T(1, c, q)$ | .04           | .12       | .30       | .40       |
|                                        | $u^{true}(c, q)$ | 61.1          | 58.7      | 51.6      | 48.0      |
| $q = 0.2$                              | $F_E(0, c, q)$   | .14           | .15       | .16       | .17       |
|                                        | $F_E(1, c, q)$   | .67           | .69       | .71       | .73       |
|                                        | $\pi_T(0, c, q)$ | .06           | .12       | .18       | .24       |
|                                        | $\pi_T(1, c, q)$ | .12           | .24       | .36       | .48       |
|                                        | $u^{true}(c, q)$ | 58.2          | 53.9      | 49.5      | 45.0      |

**Supplementary Table 5.** Scenario where all treatments are excessively toxic.

---

| Scenario 5 (All treatments excessively toxic) |                  | Concentration |           |           |           |
|-----------------------------------------------|------------------|---------------|-----------|-----------|-----------|
|                                               |                  | $c = 0.2$     | $c = 0.3$ | $c = 0.4$ | $c = 0.5$ |
| Bolus                                         |                  | <hr/>         |           |           |           |
| $q = 0.1$                                     | $F_E(0, c, q)$   | .10           | .15       | .20       | .25       |
|                                               | $F_E(1, c, q)$   | .60           | .65       | .70       | .75       |
|                                               | $\pi_T(0, c, q)$ | .15           | .20       | .25       | .30       |
|                                               | $\pi_T(1, c, q)$ | .35           | .40       | .45       | .50       |
|                                               | $u^{true}(c, q)$ | 44.8          | 45.2      | 45.2      | 45.0      |
| $q = 0.2$                                     | $F_E(0, c, q)$   | .15           | .20       | .25       | .30       |
|                                               | $F_E(1, c, q)$   | .65           | .70       | .75       | .80       |
|                                               | $\pi_T(0, c, q)$ | .20           | .25       | .30       | .35       |
|                                               | $\pi_T(1, c, q)$ | .40           | .45       | .50       | .55       |
|                                               | $u^{true}(c, q)$ | 45.2          | 45.2      | 45.0      | 44.3      |

---

**Supplementary Table 6.** Scenario where all treatments have unacceptably low efficacy.

| Scenario 6 (All treatments have low efficacy) |                  | Concentration |           |           |           |
|-----------------------------------------------|------------------|---------------|-----------|-----------|-----------|
|                                               |                  | $c = 0.2$     | $c = 0.3$ | $c = 0.4$ | $c = 0.5$ |
| $q = 0.1$                                     | $F_E(0, c, q)$   | .05           | .06       | .07       | .08       |
|                                               | $F_E(1, c, q)$   | .20           | .25       | .30       | .35       |
|                                               | $\pi_T(0, c, q)$ | .02           | .03       | .03       | .03       |
|                                               | $\pi_T(1, c, q)$ | .04           | .06       | .08       | .12       |
|                                               | $u^{true}(c, q)$ | 38.2          | 40.0      | 41.9      | 43.3      |
| $q = 0.2$                                     | $F_E(0, c, q)$   | .06           | .07       | .08       | .09       |
|                                               | $F_E(1, c, q)$   | .22           | .27       | .32       | .37       |
|                                               | $\pi_T(0, c, q)$ | .02           | .03       | .03       | .03       |
|                                               | $\pi_T(1, c, q)$ | .04           | .06       | .08       | .12       |
|                                               | $u^{true}(c, q)$ | 39.3          | 41.2      | 43.1      | 44.4      |

**Supplementary Table 7.** Comparison of the summary  $R$  statistic and stopping percentage for various sample sizes using the assumed prior with the computed means and  $\sigma = 9$  for the  $\theta_j$ 's and a highly non-informative prior with  $\text{mean}\{\log(\theta_j)\} = 0$  and  $\sigma = 20$  for all entries of  $\theta$ .

| <i>Assumed prior</i> |        |        |        |        |        |        |         |        |
|----------------------|--------|--------|--------|--------|--------|--------|---------|--------|
|                      | n = 24 |        | n = 36 |        | n = 60 |        | n = 240 |        |
| Scenario             | R      | % none | R      | % none | R      | % none | R       | % none |
| 1                    | 0.78   | 6      | 0.79   | 6      | 0.81   | 6      | 0.87    | 8      |
| 2                    | 0.87   | 2      | 0.89   | 2      | 0.91   | 2      | 0.98    | 2      |
| 3                    | 0.75   | 8      | 0.75   | 9      | 0.76   | 11     | 0.82    | 22     |
| 4                    | 0.78   | 10     | 0.82   | 12     | 0.87   | 14     | 0.91    | 17     |
| 5                    | 0.71   | 80     | 0.72   | 91     | 0.67   | 98     | —       | 100    |
| 6                    | 0.81   | 73     | 0.83   | 83     | 0.87   | 93     | —       | 100    |

*Highly non-informative prior*

| Scenario | n = 24 |        | n = 36 |        | n = 60 |        | n = 240 |        |
|----------|--------|--------|--------|--------|--------|--------|---------|--------|
|          | R      | % none | R      | % none | R      | % none | R       | % none |
| 1        | 0.64   | 12     | 0.64   | 13     | 0.67   | 14     | 0.79    | 15     |
| 2        | 0.68   | 7      | 0.71   | 7      | 0.75   | 7      | 0.92    | 8      |
| 3        | 0.81   | 7      | 0.81   | 8      | 0.81   | 9      | 0.83    | 15     |
| 4        | 0.86   | 6      | 0.88   | 7      | 0.90   | 8      | 0.92    | 10     |
| 5        | 0.71   | 79     | 0.69   | 89     | 0.70   | 97     | —       | 100    |
| 6        | 0.70   | 81     | 0.73   | 90     | 0.82   | 96     | —       | 100    |



**Supplementary Table 8.** Comparison of the summary  $R$  statistic and stopping percentage for various cohort sizes. The prior standard deviation 9 was assumed for  $\log(\alpha_j)$  and  $\log(\beta_r)$  for all  $j$  and  $r$ .

| Scenario | cohort = 1 |        | cohort = 2 |        | cohort = 3 |        |
|----------|------------|--------|------------|--------|------------|--------|
|          | R          | % none | R          | % none | R          | % none |
| 1        | 0.79       | 6      | 0.77       | 5      | 0.76       | 8      |
| 2        | 0.89       | 2      | 0.86       | 2      | 0.84       | 4      |
| 3        | 0.75       | 9      | 0.76       | 7      | 0.77       | 6      |
| 4        | 0.82       | 12     | 0.82       | 9      | 0.81       | 6      |
| 5        | 0.72       | 91     | 0.71       | 89     | 0.72       | 87     |
| 6        | 0.83       | 83     | 0.83       | 82     | 0.81       | 83     |

**Supplementary Table 9.** Comparison of the summary  $R$  statistic and stopping percentage for various prior standard deviations  $\sigma$  of  $\log(\alpha_j)$  and  $\log(\beta_r)$  for all  $j$  and  $r$ . The main results used  $\sigma = 9$ .

| Scenario | $\sigma = 7$ |        | $\sigma = 9$ |        | $\sigma = 11$ |        | $\sigma = 20$ |        |
|----------|--------------|--------|--------------|--------|---------------|--------|---------------|--------|
|          | R            | % none | R            | % none | R             | % none | R             | % none |
| 1        | 0.84         | 4      | 0.79         | 6      | 0.75          | 8      | 0.68          | 11     |
| 2        | 0.94         | 1      | 0.89         | 2      | 0.85          | 3      | 0.76          | 5      |
| 3        | 0.71         | 11     | 0.75         | 9      | 0.77          | 9      | 0.79          | 9      |
| 4        | 0.79         | 15     | 0.82         | 12     | 0.84          | 11     | 0.87          | 8      |
| 5        | 0.72         | 91     | 0.72         | 91     | 0.71          | 90     | 0.69          | 89     |
| 6        | 0.86         | 80     | 0.83         | 83     | 0.81          | 85     | 0.76          | 89     |

**Supplementary Table 10.** Comparison of the summary  $R$  statistics and stopping percentages for various interpolation methods to obtain  $\lambda^{true}$  between the successive evaluation times  $s = 0, 0.125, \dots, 0.875, 1.0$ . For infusion time  $s$  in  $(0, 1)$ , the true intermediate probabilities were interpolated as  $\pi(s, c, q) = \pi(0, c, q) + \{\pi(1, c, q) - \pi(0, c, q)\}s^\phi$ . The power  $\phi = 1$  for linear interpolation,  $\phi = 2$  for “below linear”, and  $\phi = 0.5$  for “above linear”. The “S-shaped” interpolation method sets  $\pi(0.5, c, q) = 0.5\{\pi(0, c, q) + \pi(1, c, q)\}$  and interpolates with  $\phi = 2$  for  $s < 0.5$  and with  $\phi = 0.5$  for  $s > 0.5$ . The main results used linear interpolation.

| Scenario | Below linear |        | Linear |        | Above linear |        | <i>S – shaped</i> |        |
|----------|--------------|--------|--------|--------|--------------|--------|-------------------|--------|
|          | R            | % none | R      | % none | R            | % none | R                 | % none |
| 1        | 0.84         | 6      | 0.79   | 6      | 0.75         | 7      | 0.81              | 6      |
| 2        | 0.92         | 2      | 0.89   | 2      | 0.84         | 3      | 0.90              | 2      |
| 3        | 0.74         | 10     | 0.75   | 9      | 0.75         | 9      | 0.75              | 10     |
| 4        | 0.68         | 15     | 0.82   | 12     | 0.87         | 9      | 0.76              | 13     |
| 5        | 0.58         | 90     | 0.72   | 91     | 0.84         | 91     | 0.72              | 92     |
| 6        | 0.92         | 81     | 0.83   | 83     | 0.78         | 83     | 0.86              | 83     |

**Supplementary Table 11.** Comparison of the summary  $R$  statistics and stopping percentages for various true effects  $\beta_4^{true} = k E_{prior}(\beta_4)$  on  $\pi_T$  of failure to dissolve the clot within 120 minutes, i.e.  $Y > 1$ .

| Scenario | $k = 1$ |        | $k = 3$ |        | $k = 6$ |        | $k = 9$ |        |
|----------|---------|--------|---------|--------|---------|--------|---------|--------|
|          | R       | % none |
| 1        | 0.79    | 6      | 0.79    | 11     | 0.79    | 25     | 0.81    | 37     |
| 2        | 0.89    | 2      | 0.89    | 5      | 0.89    | 12     | 0.89    | 25     |
| 3        | 0.75    | 9      | 0.75    | 16     | 0.77    | 28     | 0.79    | 40     |
| 4        | 0.82    | 12     | 0.82    | 20     | 0.82    | 35     | 0.81    | 51     |
| 5        | 0.72    | 91     | 0.56    | 93     | 0.46    | 96     | 0.53    | 98     |
| 6        | 0.83    | 83     | 0.83    | 84     | 0.84    | 88     | 0.79    | 93     |

**Supplementary Table 12.** Simulation results for the reduced 6-parameter model with Weibull hazard. Under each scenario,  $u^{true}(c, q)$  denotes the expected utility of treating a patient with the combination  $(c, q)$ . The value of the utility for the combination with the highest utility is highlighted in bold. Utilities of combinations that are too toxic or have insufficient effectiveness in the scenario have a gray background.

| Scenario                            | $q$ |                   | $c$         |           |             |             | % none |
|-------------------------------------|-----|-------------------|-------------|-----------|-------------|-------------|--------|
|                                     |     |                   | 0.2         | 0.3       | 0.4         | 0.5         |        |
| 1                                   | 0.1 | $u^{true}(c, q)$  | 46.9        | 51.5      | 59.2        | 64.4        | 2      |
|                                     |     | % Sel (No. Pats.) | 0% (1.2)    | 0% (0.1)  | 0% (0.1)    | 1% (0.6)    |        |
| <i>Prior means</i>                  | 0.2 | $u^{true}(c, q)$  | 56.1        | 60.5      | 65.1        | <b>70.6</b> |        |
|                                     |     | % Sel (No. Pats.) | 0% (0.2)    | 0% (1.1)  | 1% (1.2)    | 96% (31.2)  |        |
| 2                                   | 0.1 | $u^{true}(c, q)$  | 49.0        | 54.9      | 62.4        | 71.5        | 1      |
|                                     |     | % Sel (No. Pats.) | 0% (1.1)    | 0% (0.0)  | 0% (0.0)    | 0% (0.3)    |        |
| <i>Safe, high c and q=.2 best</i>   | 0.2 | $u^{true}(c, q)$  | 52.6        | 58.4      | 65.9        | <b>73.8</b> |        |
|                                     |     | % Sel (No. Pats.) | 0% (0.1)    | 0% (1.0)  | 0% (1.0)    | 99% (32.1)  |        |
| 3                                   | 0.1 | $u^{true}(c, q)$  | 57.3        | 68.9      | <b>70.1</b> | 64.0        | 5      |
|                                     |     | % Sel (No. Pats.) | 0% (1.5)    | 1% (0.5)  | 2% (0.9)    | 5% (2.0)    |        |
| <i>Safe, middle c and q=.1 best</i> | 0.2 | $u^{true}(c, q)$  | 57.1        | 68.6      | 69.7        | 63.5        |        |
|                                     |     | % Sel (No. Pats.) | 1% (0.5)    | 7% (2.9)  | 17% (4.6)   | 61% (21.7)  |        |
| 4                                   | 0.1 | $u^{true}(c, q)$  | <b>61.1</b> | 58.7      | 51.6        | 48.0        | 14     |
|                                     |     | % Sel (No. Pats.) | 2% (2.2)    | 15% (3.0) | 18% (3.5)   | 22% (7.5)   |        |
| <i>Safe, low c and q=.1 best</i>    | 0.2 | $u^{true}(c, q)$  | 58.2        | 53.9      | 49.5        | 45.0        |        |
|                                     |     | % Sel (No. Pats.) | 12% (2.9)   | 9% (3.5)  | 4% (2.6)    | 4% (8.3)    |        |
| 5                                   | 0.1 | $u^{true}(c, q)$  | 44.8        | 45.2      | <b>45.2</b> | 45.0        | 69     |
|                                     |     | % Sel (No. Pats.) | 11% (4.8)   | 9% (2.9)  | 4% (2.0)    | 3% (3.2)    |        |
|                                     | 0.2 | $u^{true}(c, q)$  | 45.2        | 45.2      | 45.0        | 44.3        |        |
|                                     |     | % Sel (No. Pats.) | 2% (1.6)    | 1% (1.6)  | 0% (1.3)    | 0% (3.6)    |        |
| 6                                   | 0.1 | $u^{true}(c, q)$  | 38.2        | 40.0      | 41.9        | 43.3        | 70     |
|                                     |     | % Sel (No. Pats.) | 0% (1.4)    | 0% (0.0)  | 0% (0.1)    | 1% (0.7)    |        |
| <i>Safe, no (c, q) acceptable</i>   | 0.2 | $u^{true}(c, q)$  | 39.3        | 41.2      | 43.1        | <b>44.4</b> |        |
|                                     |     | % Sel (No. Pats.) | 0% (0.2)    | 0% (1.0)  | 0% (1.1)    | 30% (16.4)  |        |

**Supplementary Table 13.** Hypothetical case-by-case example of a 36 patient trial.

| Patient | Treatment |     | Outcomes |       | Posterior Mean Utility for Each $(c, q)$ |         |         |         |         |         |         |         |
|---------|-----------|-----|----------|-------|------------------------------------------|---------|---------|---------|---------|---------|---------|---------|
|         | $c$       | $q$ | $Y_E$    | $Y_T$ | (.2,.1)                                  | (.3,.1) | (.4,.1) | (.5,.1) | (.2,.2) | (.3,.2) | (.4,.2) | (.5,.2) |
| (Prior) | –         | –   | –        | –     | 42.45                                    | 42.42   | 42.37   | 42.60   | 42.03   | 41.99   | 41.92   | 42.04   |
| 1       | 0.2       | 0.1 | 45       | No    | 67.71                                    | 66.63   | 66.33   | 64.14   | 67.32   | 66.24   | 65.94   | 63.62   |
| 2       | 0.2       | 0.1 | 45       | No    | 75.63                                    | 73.18   | 71.06   | 66.59   | 74.62   | 72.58   | 70.64   | 66.28   |
| 3       | 0.2       | 0.1 | No       | No    | 59.61                                    | 58.98   | 59.28   | 58.17   | 59.38   | 58.75   | 59.02   | 57.76   |
| 4       | 0.2       | 0.1 | No       | No    | 52.29                                    | 52.17   | 52.73   | 52.77   | 52.13   | 52.00   | 52.54   | 52.46   |
| 5       | 0.2       | 0.1 | No       | No    | 47.80                                    | 47.94   | 48.69   | 49.21   | 47.67   | 47.81   | 48.55   | 48.96   |
| 6       | 0.3       | 0.1 | 75       | No    | 52.26                                    | 52.76   | 53.31   | 53.14   | 52.18   | 52.67   | 53.17   | 52.87   |
| 7       | 0.4       | 0.1 | 90       | No    | 54.81                                    | 55.18   | 55.56   | 55.30   | 54.77   | 55.15   | 55.51   | 55.09   |
| 8       | 0.4       | 0.1 | 105      | No    | 56.18                                    | 56.63   | 57.13   | 56.59   | 56.21   | 56.68   | 57.18   | 56.46   |
| 9       | 0.4       | 0.2 | 0        | No    | 59.45                                    | 60.28   | 62.49   | 63.53   | 60.91   | 61.88   | 64.26   | 65.10   |
| 10      | 0.5       | 0.2 | 90       | Yes   | 60.14                                    | 60.80   | 61.07   | 26.92   | 61.03   | 61.74   | 61.91   | 26.72   |
| 11      | 0.4       | 0.2 | 120      | No    | 59.94                                    | 60.65   | 61.28   | 26.02   | 61.05   | 61.84   | 62.43   | 26.08   |
| 12      | 0.4       | 0.2 | No       | Yes   | 54.79                                    | 54.81   | 53.04   | 33.23   | 54.84   | 54.78   | 52.54   | 32.22   |
| 13      | 0.2       | 0.2 | No       | No    | 53.24                                    | 53.38   | 51.48   | 31.25   | 53.22   | 53.27   | 50.82   | 30.08   |
| 14      | 0.3       | 0.1 | 0        | No    | 56.41                                    | 56.66   | 54.78   | 34.30   | 56.41   | 56.57   | 54.09   | 33.01   |
| 15      | 0.3       | 0.1 | 15       | No    | 58.63                                    | 58.83   | 56.79   | 34.85   | 58.50   | 58.60   | 55.94   | 33.41   |
| 16      | 0.3       | 0.1 | 0        | No    | 61.07                                    | 61.34   | 59.37   | 37.28   | 60.89   | 61.05   | 58.40   | 35.64   |
| 17      | 0.3       | 0.1 | 105      | No    | 61.54                                    | 61.82   | 59.65   | 36.46   | 61.54   | 61.71   | 58.81   | 34.97   |
| 18      | 0.3       | 0.1 | 120      | No    | 61.34                                    | 61.75   | 59.65   | 35.00   | 61.57   | 61.90   | 59.09   | 33.66   |
| 19      | 0.3       | 0.2 | No       | No    | 60.08                                    | 60.47   | 58.22   | 32.62   | 60.25   | 60.57   | 57.57   | 31.21   |
| 20      | 0.3       | 0.2 | No       | Yes   | 56.27                                    | 56.46   | 55.64   | 37.51   | 55.86   | 55.94   | 54.73   | 35.80   |
| 21      | 0.3       | 0.1 | 0        | No    | 58.16                                    | 58.46   | 57.66   | 39.25   | 57.82   | 57.99   | 56.79   | 37.47   |
| 22      | 0.3       | 0.1 | 0        | No    | 59.95                                    | 60.29   | 59.56   | 41.20   | 59.65   | 59.88   | 58.77   | 39.50   |
| 23      | 0.3       | 0.1 | No       | No    | 58.74                                    | 59.05   | 58.21   | 40.15   | 58.39   | 58.57   | 57.29   | 38.34   |
| 24      | 0.3       | 0.1 | No       | No    | 57.63                                    | 57.93   | 56.97   | 39.36   | 57.33   | 57.50   | 56.06   | 37.56   |

**Supplementary Table 13.** (continued) Hypothetical case-by-case example of a 36 patient trial.

| Patient | Treatment |     | Outcomes |       | Posterior Mean Utility for Each $(c, q)$ |         |         |         |         |         |         |         |
|---------|-----------|-----|----------|-------|------------------------------------------|---------|---------|---------|---------|---------|---------|---------|
|         | $c$       | $q$ | $Y_E$    | $Y_T$ | (.2,.1)                                  | (.3,.1) | (.4,.1) | (.5,.1) | (.2,.2) | (.3,.2) | (.4,.2) | (.5,.2) |
| 25      | 0.3       | 0.1 | No       | No    | 56.54                                    | 56.88   | 55.92   | 38.89   | 56.23   | 56.43   | 54.98   | 37.12   |
| 26      | 0.3       | 0.1 | 30       | No    | 57.72                                    | 58.00   | 56.91   | 38.77   | 57.35   | 57.48   | 55.89   | 36.89   |
| 27      | 0.3       | 0.1 | No       | Yes   | 55.38                                    | 55.67   | 55.17   | 36.98   | 55.11   | 55.31   | 54.58   | 35.56   |
| 28      | 0.3       | 0.1 | 0        | No    | 56.87                                    | 57.23   | 56.79   | 38.24   | 56.67   | 56.95   | 56.26   | 36.82   |
| 29      | 0.3       | 0.1 | No       | No    | 55.94                                    | 56.27   | 55.77   | 38.17   | 55.71   | 55.95   | 55.19   | 36.76   |
| 30      | 0.3       | 0.1 | 105      | No    | 56.41                                    | 56.78   | 56.31   | 37.48   | 56.21   | 56.49   | 55.76   | 36.03   |
| 31      | 0.3       | 0.1 | 90       | No    | 56.83                                    | 57.27   | 56.80   | 36.23   | 56.73   | 57.09   | 56.35   | 34.79   |
| 32      | 0.3       | 0.1 | 120      | No    | 56.84                                    | 57.35   | 56.95   | 35.57   | 57.04   | 57.50   | 56.84   | 34.38   |
| 33      | 0.3       | 0.2 | 30       | No    | 57.80                                    | 58.30   | 57.87   | 35.24   | 57.92   | 58.37   | 57.69   | 33.97   |
| 34      | 0.3       | 0.2 | 75       | No    | 58.25                                    | 58.79   | 58.38   | 34.00   | 58.51   | 59.02   | 58.37   | 32.80   |
| 35      | 0.3       | 0.2 | 105      | No    | 58.31                                    | 58.92   | 58.62   | 32.34   | 58.82   | 59.44   | 58.93   | 31.30   |
| 36      | 0.3       | 0.2 | 45       | No    | 58.75                                    | 59.46   | 59.20   | 32.42   | 59.41   | 60.13   | 59.65   | 31.45   |

**Supplementary Table 14.** Prior and posterior values for the hypothetical case-by-case example.

*a. Prior and posterior means and standard deviations*

| Parameter        | Prior Mean | Post Mean | Prior StdDev | Post StdDev |
|------------------|------------|-----------|--------------|-------------|
| $\log(\alpha_0)$ | -1.04      | -1.10     | 9.00         | 0.60        |
| $\log(\alpha_1)$ | -1.60      | -7.42     | 9.00         | 5.76        |
| $\log(\alpha_2)$ | -7.25      | -10.16    | 9.00         | 6.43        |
| $\log(\alpha_3)$ | -4.74      | -2.87     | 9.00         | 5.00        |
| $\log(\alpha_4)$ | -2.85      | -4.29     | 9.00         | 7.03        |
| $\log(\alpha_5)$ | 2.37       | -1.21     | 9.00         | 6.11        |
| $\log(\beta_0)$  | -6.10      | -10.77    | 9.00         | 5.88        |
| $\log(\beta_1)$  | -3.79      | 1.70      | 9.00         | 6.72        |
| $\log(\beta_2)$  | -7.05      | -5.03     | 9.00         | 8.16        |
| $\log(\beta_3)$  | -5.42      | -2.66     | 9.00         | 7.14        |
| $\log(\beta_4)$  | -7.88      | -4.76     | 9.00         | 5.79        |

*b. Prior and posterior probabilities at  $s = 1$ , with standard deviations as subscripts.*

|                                       | $(c, q)$ |          |          |          |          |          |          |          |
|---------------------------------------|----------|----------|----------|----------|----------|----------|----------|----------|
|                                       | (.2,.1)  | (.3,.1)  | (.4,.1)  | (.5,.1)  | (.2,.2)  | (.3,.2)  | (.4,.2)  | (.5,.2)  |
| <i>Prior</i>                          |          |          |          |          |          |          |          |          |
| $F_E(1, c, q, \boldsymbol{\theta})$   | .565.451 | .568.449 | .571.448 | .610.438 | .566.450 | .569.449 | .573.448 | .613.438 |
| $\pi_T(1, c, q, \boldsymbol{\theta})$ | .522.449 | .527.448 | .533.448 | .569.442 | .528.449 | .533.448 | .539.447 | .613.438 |
| <i>Posterior</i>                      |          |          |          |          |          |          |          |          |
| $F_E(1, c, q, \boldsymbol{\theta})$   | .602.087 | .617.076 | .633.084 | .651.108 | .613.089 | .629.080 | .645.091 | .663.113 |
| $\pi_T(1, c, q, \boldsymbol{\theta})$ | .195.121 | .202.116 | .235.132 | .708.349 | .197.120 | .205.114 | .241.132 | .726.342 |
